# Supplementary material for: Pilot study indicate role of preferentially transmitted monoamine oxidase gene variants in behavioral problems of male ADHD probands
Source: PubMed Central journal article supplement (PMC5629801; doi:10.1186/s12881-017-0469-5), 2017-10-05
Supplement: 12881_2017_469_MOESM1_ESM.pdf [file 12881_2017_469_MOESM1_ESM.pdf]

**Additional file 1: The Hardy-Weinberg equilibrium test performed in female subjects**

| Genes       | Variants   | Genotypes    | Proband              |                    | Mother               |                    |
|-------------|------------|--------------|----------------------|--------------------|----------------------|--------------------|
|             |            |              | Count<br>(Frequency) | $\chi^2$ (p-value) | Count<br>(Frequency) | $\chi^2$ (p-value) |
| <i>MAOA</i> | 30bp-uVNTR | <i>3R/3R</i> | 9 (0.38)             | 0.49 (0.48)        | 78 (0.45)            | 0.28 (0.60)        |
|             |            | <i>3R/4R</i> | 10 (0.42)            |                    | 74 (0.43)            |                    |
|             |            | <i>4R/4R</i> | 5 (0.20)             |                    | 21 (0.12)            |                    |
|             | rs5906883  | <i>AA</i>    | 10 (0.42)            | 1.12 (0.29)        | 73 (0.42)            | 0.03 (0.86)        |
|             |            | <i>AC</i>    | 9 (0.38)             |                    | 78 (0.45)            |                    |
|             |            | <i>CC</i>    | 5 (0.20)             |                    | 22 (0.13)            |                    |
|             | rs1465107  | <i>GG</i>    | 5 (0.20)             | 0.49 (0.48)        | 21 (0.12)            | 0.16 (0.69)        |
|             |            | <i>GA</i>    | 10 (0.42)            |                    | 82 (0.47)            |                    |
|             |            | <i>AA</i>    | 9 (0.38)             |                    | 70 (0.41)            |                    |
|             | rs1465108  | <i>AA</i>    | 9 (0.38)             | 0.49 (0.48)        | 70 (0.41)            | 0.16 (0.69)        |
|             |            | <i>AG</i>    | 10 (0.42)            |                    | 82 (0.47)            |                    |
|             |            | <i>GG</i>    | 5 (0.20)             |                    | 21 (0.12)            |                    |
|             | rs5905809  | <i>CC</i>    | 9 (0.38)             | 2.59 (0.11)        | 23 (0.13)            | 1.14 (0.29)        |
|             |            | <i>CG</i>    | 8 (0.33)             |                    | 89 (0.52)            |                    |
| <i>GG</i>   |            | 7 (0.29)     | 61 (0.35)            |                    |                      |                    |
| rs5906957   | <i>AA</i>  | 7 (0.29)     | 2.59 (0.11)          | 61 (0.35)          | 1.14 (0.29)          |                    |
|             | <i>AG</i>  | 8 (0.33)     |                      | 89 (0.52)          |                      |                    |
|             | <i>GG</i>  | 9 (0.38)     |                      | 23 (0.13)          |                      |                    |
| rs6323      | <i>TT</i>  | 6 (0.25)     | 2.37 (0.12)          | 16 (0.09)          | 2.26 (0.13)          |                    |
|             | <i>TG</i>  | 8 (0.33)     |                      | 87 (0.50)          |                      |                    |
|             | <i>GG</i>  | 10 (0.42)    |                      | 70 (0.41)          |                      |                    |
| rs1137070   | <i>CC</i>  | 5 (0.21)     | 0.11 (0.74)          | 23 (0.13)          | 0.01 (0.92)          |                    |
|             | <i>CT</i>  | 11 (0.46)    |                      | 81 (0.47)          |                      |                    |
|             | <i>TT</i>  | 8 (0.33)     |                      | 69 (0.40)          |                      |                    |
| <i>MAOB</i> | rs4824562  | <i>AA</i>    | 14 (0.58)            | 0.09 (0.76)        | 102 (0.59)           | 0.19 (0.66)        |
|             |            | <i>AG</i>    | 9 (0.38)             |                    | 63 (0.36)            |                    |
|             |            | <i>GG</i>    | 1 (0.04)             |                    | 8 (0.05)             |                    |
|             | rs56220155 | <i>GG</i>    | 1 (0.04)             | 3.22 (0.07)        | 21 (0.12)            | 0.00 (1.00)        |
|             |            | <i>GA</i>    | 15 (0.63)            |                    | 79 (0.46)            |                    |
|             |            | <i>AA</i>    | 8 (0.33)             |                    | 73 (0.42)            |                    |
|             | rs2283728  | <i>TT</i>    | 1 (0.04)             | 0.09 (0.76)        | 15 (0.09)            | 0.41 (0.52)        |
|             |            | <i>TC</i>    | 9 (0.38)             |                    | 66 (0.38)            |                    |
|             |            | <i>CC</i>    | 14 (0.58)            |                    | 92 (0.53)            |                    |
|             | rs2283727  | <i>CC</i>    | 14 (0.58)            | 0.09 (0.76)        | 92 (0.53)            | 0.41 (0.52)        |
|             |            | <i>CA</i>    | 9 (0.38)             |                    | 66 (0.38)            |                    |
|             |            | <i>AA</i>    | 1 (0.04)             |                    | 15 (0.09)            |                    |
|             | rs3027441  | <i>CC</i>    | 1 (0.04)             | 0.04 (0.84)        | 13 (0.07)            | 0.04 (0.84)        |
|             |            | <i>CT</i>    | 7 (0.29)             |                    | 67 (0.39)            |                    |
| <i>TT</i>   |            | 16 (0.67)    | 93 (0.54)            |                    |                      |                    |
| rs6324      | <i>CC</i>  | 16 (0.67)    | 0.04 (0.84)          | 93 (0.54)          | 0.04 (0.84)          |                    |
|             | <i>CT</i>  | 7 (0.29)     |                      | 67 (0.39)          |                      |                    |
|             | <i>TT</i>  | 1 (0.04)     |                      | 13 (0.07)          |                      |                    |
| rs3027440   | <i>TT</i>  | 16 (0.67)    | 0.04 (0.84)          | 102 (0.59)         | 0.01 (0.92)          |                    |
|             | <i>TC</i>  | 7 (0.29)     |                      | 62 (0.36)          |                      |                    |
|             | <i>CC</i>  | 1 (0.04)     |                      | 9 (0.05)           |                      |                    |
