# Supplementary material for: Pilot study indicate role of preferentially transmitted monoamine oxidase gene variants in behavioral problems of male ADHD probands
Source: PubMed Central journal article supplement (PMC5629801; doi:10.1186/s12881-017-0469-5), 2017-10-05
Supplement: 12881_2017_469_MOESM2_ESM.pdf [file 12881_2017_469_MOESM2_ESM.pdf]

**Additional file 2: Parental allelic transmission in female ADHD probands**

| <b>Genes</b> | <b>Variants</b> | <b>Alleles</b> | <b>Transmitted</b> | <b>Non-transmitted</b> | <b><sup>2</sup> (p-value)</b> |
|--------------|-----------------|----------------|--------------------|------------------------|-------------------------------|
| <i>MAOA</i>  | 30bp-uVNTR      | 3R             | 0.57               | 0.73                   | 1.22 (0.27)                   |
|              |                 | 4R             | 0.43               | 0.27                   |                               |
|              | rs5906883       | A              | 0.60               | 0.60                   | 0.00 (1.00)                   |
|              |                 | C              | 0.40               | 0.40                   |                               |
|              | rs1465107       | G              | 0.40               | 0.40                   | 0.00 (1.00)                   |
|              |                 | A              | 0.60               | 0.60                   |                               |
|              | rs1465108       | A              | 0.60               | 0.60                   | 0.00 (1.00)                   |
|              |                 | G              | 0.40               | 0.40                   |                               |
|              | rs5905809       | C              | 0.47               | 0.33                   | 0.74 (0.39)                   |
|              |                 | G              | 0.53               | 0.67                   |                               |
|              | rs5906957       | A              | 0.53               | 0.67                   | 0.74 (0.39)                   |
|              |                 | G              | 0.47               | 0.33                   |                               |
|              | rs6323          | T              | 0.37               | 0.33                   | 0.05 (0.83)                   |
|              |                 | G              | 0.63               | 0.67                   |                               |
| rs1137070    | C               | 0.40           | 0.33               | 0.19 (0.66)            |                               |
|              | T               | 0.60           | 0.67               |                        |                               |
| <i>MAOB</i>  | rs4824562       | A              | 0.77               | 0.87                   | 0.66 (0.42)                   |
|              |                 | G              | 0.23               | 0.13                   |                               |
|              | rs56220155      | G              | 0.40               | 0.20                   | 1.89 (0.17)                   |
|              |                 | A              | 0.60               | 0.80                   |                               |
|              | rs2283728       | T              | 0.30               | 0.13                   | 1.62 (0.20)                   |
|              |                 | C              | 0.70               | 0.87                   |                               |
|              | rs2283727       | C              | 0.70               | 0.87                   | 1.62 (0.20)                   |
|              |                 | A              | 0.30               | 0.13                   |                               |
|              | rs3027441       | C              | 0.23               | 0.20                   | 0.07 (0.80)                   |
|              |                 | T              | 0.77               | 0.80                   |                               |
|              | rs6324          | C              | 0.77               | 0.80                   | 0.07 (0.80)                   |
|              |                 | T              | 0.23               | 0.20                   |                               |
|              | rs3027440       | T              | 0.80               | 0.80                   | 0.00 (1.00)                   |
|              |                 | C              | 0.20               | 0.20                   |                               |
