# Supplementary material for: Pilot study indicate role of preferentially transmitted monoamine oxidase gene variants in behavioral problems of male ADHD probands
Source: PubMed Central journal article supplement (PMC5629801; doi:10.1186/s12881-017-0469-5), 2017-10-05
Supplement: 12881_2017_469_MOESM4_ESM.pdf [file 12881_2017_469_MOESM4_ESM.pdf]

**Additional file 4: Maternal haplotypes not-transmitted to male ADHD probands  
(only significant data presented)**

| <b>Variant Combinations</b> | <b>Haplotypes</b> | <b>Transmitted</b> | <b>Non-transmitted</b> | <b><sup>2</sup> (p-value)</b> |
|-----------------------------|-------------------|--------------------|------------------------|-------------------------------|
| 30bp-uVNTR-rs5905809        | <i>3R-C</i>       | 0.05               | 0.16                   | 8.94 ( <b>0.003</b> )         |
| 30bp-uVNTR-rs5906957        | <i>3R-G</i>       | 0.05               | 0.16                   | 8.94 ( <b>0.003</b> )         |
| 30bp-uVNTR-rs6323           | <i>3R-T</i>       | 0.06               | 0.16                   | 7.65 ( <b>0.006</b> )         |
| 30bp-uVNTR-rs3027440        | <i>4R-C</i>       | 0.02               | 0.11                   | 10.49 ( <b>0.001</b> )        |
| 30bp-uVNTR-rs6324           | <i>4R-T</i>       | 0.03               | 0.11                   | 6.19 ( <b>0.01</b> )          |
| 30bp-uVNTR-rs3027441        | <i>4R-C</i>       | 0.03               | 0.11                   | 6.19 ( <b>0.01</b> )          |
| rs5906883-rs5905809         | <i>A-C</i>        | 0.02               | 0.12                   | 11.51 ( <b>0.0007</b> )       |
| rs5906883-rs5906957         | <i>A-G</i>        | 0.02               | 0.12                   | 11.51 ( <b>0.0007</b> )       |
| rs5906883-rs6323            | <i>C-T</i>        | 0.18               | 0.32                   | 7.81 ( <b>0.005</b> )         |
| rs5906883-rs3027440         | <i>C-C</i>        | 0.02               | 0.11                   | 10.49 ( <b>0.001</b> )        |
| rs5906883-rs6324            | <i>C-T</i>        | 0.03               | 0.12                   | 9.60 ( <b>0.002</b> )         |
| rs5906883-rs3027441         | <i>C-C</i>        | 0.03               | 0.12                   | 9.60 ( <b>0.002</b> )         |
| rs5906883-rs2283727         | <i>C-A</i>        | 0.03               | 0.10                   | 6.79 ( <b>0.009</b> )         |
| rs5906883-rs2283728         | <i>C-T</i>        | 0.03               | 0.10                   | 6.79 ( <b>0.009</b> )         |
| rs5906883-rs56220155        | <i>C-G</i>        | 0.05               | 0.14                   | 7.71 ( <b>0.005</b> )         |
| rs1465107-rs5905809         | <i>A-C</i>        | 0.03               | 0.12                   | 7.95 ( <b>0.005</b> )         |
| rs1465107-rs5906957         | <i>A-G</i>        | 0.03               | 0.12                   | 7.95 ( <b>0.005</b> )         |
| rs1465107-rs6323            | <i>G-T</i>        | 0.17               | 0.32                   | 9.36 ( <b>0.002</b> )         |
| rs1465107-rs3027440         | <i>G-C</i>        | 0.02               | 0.11                   | 10.49 ( <b>0.001</b> )        |
| rs1465107-rs6324            | <i>G-T</i>        | 0.03               | 0.14                   | 12.60 ( <b>0.0004</b> )       |
| rs1465107-rs3027441         | <i>G-C</i>        | 0.03               | 0.14                   | 12.60 ( <b>0.0004</b> )       |
| rs1465107-rs2283727         | <i>G-A</i>        | 0.03               | 0.13                   | 10.58 ( <b>0.001</b> )        |
| rs1465107-rs2283728         | <i>G-T</i>        | 0.03               | 0.13                   | 10.58 ( <b>0.001</b> )        |
| rs1465107-rs56220155        | <i>G-G</i>        | 0.05               | 0.16                   | 11.32 ( <b>0.0008</b> )       |
| rs1465108-rs5905809         | <i>A-C</i>        | 0.03               | 0.12                   | 7.95 ( <b>0.005</b> )         |
| rs1465108-rs5906957         | <i>A-G</i>        | 0.03               | 0.12                   | 7.95 ( <b>0.005</b> )         |
| rs1465108-rs6323            | <i>G-T</i>        | 0.17               | 0.32                   | 9.36 ( <b>0.002</b> )         |
| rs1465108-rs3027440         | <i>G-C</i>        | 0.02               | 0.11                   | 10.49 ( <b>0.001</b> )        |
| rs1465108-rs6324            | <i>G-T</i>        | 0.03               | 0.14                   | 12.60 ( <b>0.0004</b> )       |
| rs1465108-rs3027441         | <i>G-C</i>        | 0.03               | 0.14                   | 12.60 ( <b>0.0004</b> )       |
| rs1465108-rs2283727         | <i>G-A</i>        | 0.03               | 0.13                   | 10.58 ( <b>0.001</b> )        |
| rs1465108-rs2283728         | <i>G-T</i>        | 0.03               | 0.13                   | 10.58 ( <b>0.001</b> )        |
| rs1465108-rs56220155        | <i>G-G</i>        | 0.05               | 0.16                   | 11.32 ( <b>0.0008</b> )       |
| rs5905809-rs6323            | <i>C-T</i>        | 0.18               | 0.33                   | 8.35 ( <b>0.004</b> )         |
| rs5905809-rs3027440         | <i>C-C</i>        | 0.02               | 0.12                   | 11.51 ( <b>0.0007</b> )       |
| rs5905809-rs6324            | <i>C-T</i>        | 0.03               | 0.14                   | 12.60 ( <b>0.0004</b> )       |
| rs5905809-rs3027441         | <i>C-C</i>        | 0.03               | 0.14                   | 12.60 ( <b>0.0004</b> )       |
| rs5905809-rs2283727         | <i>C-A</i>        | 0.03               | 0.12                   | 9.60 ( <b>0.002</b> )         |
| rs5905809-rs2283728         | <i>C-T</i>        | 0.03               | 0.12                   | 9.60 ( <b>0.002</b> )         |
| rs5905809-rs56220155        | <i>C-G</i>        | 0.05               | 0.17                   | 12.27 ( <b>0.0005</b> )       |
| rs5906957-rs6323            | <i>G-T</i>        | 0.18               | 0.33                   | 8.35 ( <b>0.004</b> )         |
| rs5906957-rs3027440         | <i>G-C</i>        | 0.02               | 0.12                   | 11.51 ( <b>0.0007</b> )       |
| rs5906957-rs6324            | <i>G-T</i>        | 0.03               | 0.14                   | 12.60 ( <b>0.0004</b> )       |
| rs5906957-rs3027441         | <i>G-C</i>        | 0.03               | 0.14                   | 12.60 ( <b>0.0004</b> )       |
| rs5906957-rs2283727         | <i>G-A</i>        | 0.03               | 0.12                   | 9.60 ( <b>0.002</b> )         |
| rs5906957-rs2283728         | <i>G-T</i>        | 0.03               | 0.12                   | 9.60 ( <b>0.002</b> )         |
| rs5906957-rs56220155        | <i>G-G</i>        | 0.05               | 0.17                   | 12.27 ( <b>0.0005</b> )       |
| rs6323-rs1137070            | <i>T-C</i>        | 0.18               | 0.34                   | 9.93 ( <b>0.002</b> )         |
| rs6323-rs3027440            | <i>T-C</i>        | 0.00               | 0.16                   | 26.06 ( <b>3.32E-07</b> )     |
| rs6323-rs6324               | <i>T-T</i>        | 0.00               | 0.17                   | 28.43 ( <b>9.71E-08</b> )     |
| rs6323-rs3027441            | <i>T-C</i>        | 0.00               | 0.17                   | 28.43 ( <b>9.71E-08</b> )     |
| rs6323-rs2283727            | <i>T-A</i>        | 0.01               | 0.14                   | 20.74 ( <b>5.25E-06</b> )     |
| rs6323-rs2283728            | <i>T-T</i>        | 0.01               | 0.14                   | 20.74 ( <b>5.25E-06</b> )     |
| rs6323-rs56220155           | <i>T-G</i>        | 0.01               | 0.19                   | 26.19 ( <b>3.10E-07</b> )     |
| rs6323-rs4824562            | <i>T-A</i>        | 0.18               | 0.33                   | 8.35 ( <b>0.004</b> )         |

Continued on the next page

Additional file 4: Continued

| <b>Variant Combinations</b> | <b>Haplotypes</b> | <b>Transmitted</b> | <b>Non-transmitted</b> | <b><sup>2</sup> (<i>p</i>-value)</b> |
|-----------------------------|-------------------|--------------------|------------------------|--------------------------------------|
| rs1137070-rs3027440         | <i>C-C</i>        | 0.02               | 0.13                   | 12.54 ( <b>0.0004</b> )              |
| rs1137070-rs6324            | <i>C-T</i>        | 0.03               | 0.14                   | 13.63 ( <b>0.0002</b> )              |
| rs1137070-rs3027441         | <i>C-C</i>        | 0.03               | 0.14                   | 13.63 ( <b>0.0002</b> )              |
| rs1137070-rs2283727         | <i>C-A</i>        | 0.03               | 0.12                   | 9.60 ( <b>0.002</b> )                |
| rs1137070-rs2283728         | <i>C-T</i>        | 0.03               | 0.12                   | 9.60 ( <b>0.002</b> )                |
| rs1137070-rs56220155        | <i>C-G</i>        | 0.05               | 0.16                   | 11.32 ( <b>0.0008</b> )              |
| rs3027440-rs6324            | <i>C-T</i>        | 0.14               | 0.27                   | 8.11 ( <b>0.004</b> )                |
| rs3027440-rs3027441         | <i>C-C</i>        | 0.14               | 0.27                   | 8.11 ( <b>0.004</b> )                |
| rs3027440-rs2283727         | <i>C-A</i>        | 0.13               | 0.25                   | 6.90 ( <b>0.009</b> )                |
| rs3027440-rs2283728         | <i>C-T</i>        | 0.13               | 0.25                   | 6.90 ( <b>0.009</b> )                |
| rs3027440-rs56220155        | <i>C-G</i>        | 0.13               | 0.25                   | 6.90 ( <b>0.009</b> )                |
| rs3027440-rs4824562         | <i>C-A</i>        | 0.14               | 0.26                   | 6.73 ( <b>0.009</b> )                |
| rs3027440-rs4824562         | <i>C-G</i>        | 0.01               | 0.07                   | 7.64 ( <b>0.006</b> )                |
| rs6324-rs3027441            | <i>T-C</i>        | 0.20               | 0.35                   | 8.77 ( <b>0.003</b> )                |
| rs6324-rs2283727            | <i>C-A</i>        | 0.01               | 0.08                   | 9.72 ( <b>0.002</b> )                |
| rs6324-rs2283728            | <i>C-T</i>        | 0.01               | 0.08                   | 9.72 ( <b>0.002</b> )                |
| rs6324-rs4824562            | <i>T-G</i>        | 0.00               | 0.07                   | 11.41 ( <b>0.0007</b> )              |
| rs3027441-rs4824562         | <i>C-G</i>        | 0.00               | 0.07                   | 11.41 ( <b>0.0007</b> )              |
| rs2283727-rs2283728         | <i>A-T</i>        | 0.19               | 0.36                   | 11.12 ( <b>0.0009</b> )              |
| rs2283727-rs56220155        | <i>A-G</i>        | 0.19               | 0.36                   | 10.36 ( <b>0.001</b> )               |
| rs2283727-rs4824562         | <i>A-G</i>        | 0.00               | 0.07                   | 11.41 ( <b>0.0007</b> )              |
| rs2283728-rs56220155        | <i>T-G</i>        | 0.19               | 0.36                   | 10.36 ( <b>0.001</b> )               |
| rs2283728-rs4824562         | <i>T-G</i>        | 0.00               | 0.07                   | 11.41 ( <b>0.0007</b> )              |
| rs56220155-rs4824562        | <i>G-G</i>        | 0.00               | 0.07                   | 11.41 ( <b>0.0007</b> )              |
