# Supplementary material for: Pilot study indicate role of preferentially transmitted monoamine oxidase gene variants in behavioral problems of male ADHD probands
Source: PubMed Central journal article supplement (PMC5629801; doi:10.1186/s12881-017-0469-5), 2017-10-05
Supplement: 12881_2017_469_MOESM5_ESM.pdf [file 12881_2017_469_MOESM5_ESM.pdf]

**Additional file 5: Parental haplotypic transmission to female ADHD probands**

| <b>Variant Combinations</b> | <b>Haplotypes</b> | <b>Transmitted</b> | <b>Non-transmitted</b> | <b><sup>2</sup> (<i>p</i>-value)</b> |
|-----------------------------|-------------------|--------------------|------------------------|--------------------------------------|
| 30bp-uVNTR-rs5906883        | 3R-A              | 0.47               | 0.60                   | 0.71 (0.40)                          |
| 30bp-uVNTR-rs5906883        | 3R-C              | 0.10               | 0.13                   | 0.11 (0.74)                          |
| 30bp-uVNTR-rs5906883        | 4R-A              | 0.13               | 0.00                   | 2.20 (0.14)                          |
| 30bp-uVNTR-rs5906883        | 4R-C              | 0.30               | 0.27                   | 0.05 (0.82)                          |
| 30bp-uVNTR-rs1465107        | 3R-A              | 0.47               | 0.60                   | 0.71 (0.40)                          |
| 30bp-uVNTR-rs1465107        | 3R-G              | 0.10               | 0.13                   | 0.11 (0.74)                          |
| 30bp-uVNTR-rs1465107        | 4R-A              | 0.13               | 0.00                   | 2.20 (0.14)                          |
| 30bp-uVNTR-rs1465107        | 4R-G              | 0.30               | 0.27                   | 0.05 (0.82)                          |
| 30bp-uVNTR-rs1465108        | 3R-A              | 0.47               | 0.60                   | 0.71 (0.40)                          |
| 30bp-uVNTR-rs1465108        | 3R-G              | 0.10               | 0.13                   | 0.11 (0.74)                          |
| 30bp-uVNTR-rs1465108        | 4R-A              | 0.13               | 0.00                   | 2.20 (0.14)                          |
| 30bp-uVNTR-rs1465108        | 4R-G              | 0.30               | 0.27                   | 0.05 (0.82)                          |
| 30bp-uVNTR-rs5905809        | 3R-C              | 0.13               | 0.07                   | 0.45 (0.50)                          |
| 30bp-uVNTR-rs5905809        | 3R-G              | 0.43               | 0.67                   | 2.18 (0.14)                          |
| 30bp-uVNTR-rs5905809        | 4R-C              | 0.33               | 0.27                   | 0.21 (0.65)                          |
| 30bp-uVNTR-rs5905809        | 4R-G              | 0.10               | 0.00                   | 1.61 (0.20)                          |
| 30bp-uVNTR-rs5906957        | 3R-A              | 0.43               | 0.67                   | 2.18 (0.14)                          |
| 30bp-uVNTR-rs5906957        | 3R-G              | 0.13               | 0.07                   | 0.45 (0.50)                          |
| 30bp-uVNTR-rs5906957        | 4R-A              | 0.10               | 0.00                   | 1.61 (0.20)                          |
| 30bp-uVNTR-rs5906957        | 4R-G              | 0.33               | 0.27                   | 0.21 (0.65)                          |
| 30bp-uVNTR-rs6323           | 3R-G              | 0.47               | 0.67                   | 1.61 (0.20)                          |
| 30bp-uVNTR-rs6323           | 3R-T              | 0.10               | 0.07                   | 0.14 (0.71)                          |
| 30bp-uVNTR-rs6323           | 4R-G              | 0.17               | 0.00                   | 2.81 (0.09)                          |
| 30bp-uVNTR-rs6323           | 4R-T              | 0.27               | 0.27                   | 0.00 (1.00)                          |
| 30bp-uVNTR-rs1137070        | 3R-C              | 0.13               | 0.13                   | 0.00 (1.00)                          |
| 30bp-uVNTR-rs1137070        | 3R-T              | 0.43               | 0.60                   | 1.11 (0.29)                          |
| 30bp-uVNTR-rs1137070        | 4R-C              | 0.27               | 0.20                   | 0.24 (0.62)                          |
| 30bp-uVNTR-rs1137070        | 4R-T              | 0.17               | 0.07                   | 0.87 (0.35)                          |
| 30bp-uVNTR-rs3027440        | 3R-C              | 0.10               | 0.20                   | 0.87 (0.35)                          |
| 30bp-uVNTR-rs3027440        | 3R-T              | 0.47               | 0.53                   | 0.18 (0.67)                          |
| 30bp-uVNTR-rs3027440        | 4R-C              | 0.10               | 0.00                   | 1.61 (0.20)                          |
| 30bp-uVNTR-rs3027440        | 4R-T              | 0.33               | 0.27                   | 0.21 (0.65)                          |
| 30bp-uVNTR-rs6324           | 3R-C              | 0.43               | 0.53                   | 0.40 (0.53)                          |
| 30bp-uVNTR-rs6324           | 3R-T              | 0.13               | 0.20                   | 0.34 (0.56)                          |
| 30bp-uVNTR-rs6324           | 4R-C              | 0.33               | 0.27                   | 0.21 (0.65)                          |
| 30bp-uVNTR-rs6324           | 4R-T              | 0.10               | 0.00                   | 1.61 (0.20)                          |
| 30bp-uVNTR-rs3027441        | 3R-C              | 0.13               | 0.20                   | 0.34 (0.56)                          |
| 30bp-uVNTR-rs3027441        | 3R-T              | 0.43               | 0.53                   | 0.40 (0.53)                          |
| 30bp-uVNTR-rs3027441        | 4R-C              | 0.10               | 0.00                   | 1.61 (0.20)                          |
| 30bp-uVNTR-rs3027441        | 4R-T              | 0.33               | 0.27                   | 0.21 (0.65)                          |
| 30bp-uVNTR-rs2283727        | 3R-A              | 0.20               | 0.13                   | 0.30 (0.58)                          |
| 30bp-uVNTR-rs2283727        | 3R-C              | 0.37               | 0.60                   | 2.21 (0.14)                          |
| 30bp-uVNTR-rs2283727        | 4R-A              | 0.10               | 0.00                   | 1.61 (0.20)                          |
| 30bp-uVNTR-rs2283727        | 4R-C              | 0.33               | 0.27                   | 0.21 (0.65)                          |
| 30bp-uVNTR-rs2283728        | 3R-C              | 0.37               | 0.60                   | 2.21 (0.14)                          |
| 30bp-uVNTR-rs2283728        | 3R-T              | 0.20               | 0.13                   | 0.30 (0.58)                          |
| 30bp-uVNTR-rs2283728        | 4R-C              | 0.33               | 0.27                   | 0.21 (0.65)                          |
| 30bp-uVNTR-rs2283728        | 4R-T              | 0.10               | 0.00                   | 1.61 (0.20)                          |
| 30bp-uVNTR-rs56220155       | 3R-A              | 0.33               | 0.60                   | 2.92 (0.09)                          |
| 30bp-uVNTR-rs56220155       | 3R-G              | 0.23               | 0.13                   | 0.63 (0.43)                          |
| 30bp-uVNTR-rs56220155       | 4R-A              | 0.27               | 0.20                   | 0.24 (0.62)                          |
| 30bp-uVNTR-rs56220155       | 4R-G              | 0.17               | 0.07                   | 0.87 (0.35)                          |
| 30bp-uVNTR-rs4824562        | 3R-A              | 0.40               | 0.60                   | 1.61 (0.20)                          |
| 30bp-uVNTR-rs4824562        | 3R-G              | 0.17               | 0.13                   | 0.08 (0.77)                          |
| 30bp-uVNTR-rs4824562        | 4R-A              | 0.37               | 0.27                   | 0.45 (0.50)                          |
| 30bp-uVNTR-rs4824562        | 4R-G              | 0.07               | 0.00                   | 1.05 (0.31)                          |
| rs5906883-rs1465107         | A-A               | 0.60               | 0.60                   | 0.00 (1.00)                          |
| rs5906883-rs1465107         | C-G               | 0.40               | 0.40                   | 0.00 (1.00)                          |
| rs5906883-rs1465108         | A-A               | 0.60               | 0.60                   | 0.00 (1.00)                          |

|                      |     |      |      |             |
|----------------------|-----|------|------|-------------|
| rs5906883-rs1465108  | C-G | 0.40 | 0.40 | 0.00 (1.00) |
| rs5906883-rs5905809  | A-C | 0.10 | 0.00 | 1.61 (0.20) |
| rs5906883-rs5905809  | A-G | 0.50 | 0.60 | 0.40 (0.53) |
| rs5906883-rs5905809  | C-C | 0.37 | 0.33 | 0.05 (0.83) |
| rs5906883-rs5905809  | C-G | 0.03 | 0.07 | 0.26 (0.61) |
| rs5906883-rs5906957  | A-A | 0.50 | 0.60 | 0.40 (0.53) |
| rs5906883-rs5906957  | A-G | 0.10 | 0.00 | 1.61 (0.20) |
| rs5906883-rs5906957  | C-A | 0.03 | 0.07 | 0.26 (0.61) |
| rs5906883-rs5906957  | C-G | 0.37 | 0.33 | 0.05 (0.83) |
| rs5906883-rs6323     | A-G | 0.53 | 0.53 | 0.00 (1.00) |
| rs5906883-rs6323     | A-T | 0.07 | 0.07 | 0.00 (1.00) |
| rs5906883-rs6323     | C-G | 0.10 | 0.13 | 0.11 (0.74) |
| rs5906883-rs6323     | C-T | 0.30 | 0.27 | 0.05 (0.82) |
| rs5906883-rs1137070  | A-C | 0.10 | 0.07 | 0.14 (0.71) |
| rs5906883-rs1137070  | A-T | 0.50 | 0.53 | 0.04 (0.83) |
| rs5906883-rs1137070  | C-C | 0.30 | 0.27 | 0.05 (0.82) |
| rs5906883-rs1137070  | C-T | 0.10 | 0.13 | 0.11 (0.74) |
| rs5906883-rs3027440  | A-C | 0.13 | 0.20 | 0.34 (0.56) |
| rs5906883-rs3027440  | A-T | 0.47 | 0.40 | 0.18 (0.67) |
| rs5906883-rs3027440  | C-C | 0.07 | 0.00 | 1.05 (0.31) |
| rs5906883-rs3027440  | C-T | 0.33 | 0.40 | 0.19 (0.66) |
| rs5906883-rs6324     | A-C | 0.43 | 0.40 | 0.05 (0.83) |
| rs5906883-rs6324     | A-T | 0.17 | 0.20 | 0.08 (0.78) |
| rs5906883-rs6324     | C-C | 0.33 | 0.40 | 0.19 (0.66) |
| rs5906883-rs6324     | C-T | 0.07 | 0.00 | 1.05 (0.31) |
| rs5906883-rs3027441  | A-C | 0.17 | 0.20 | 0.08 (0.78) |
| rs5906883-rs3027441  | A-T | 0.43 | 0.40 | 0.05 (0.83) |
| rs5906883-rs3027441  | C-C | 0.07 | 0.00 | 1.05 (0.31) |
| rs5906883-rs3027441  | C-T | 0.33 | 0.40 | 0.19 (0.66) |
| rs5906883-rs2283727  | A-A | 0.23 | 0.13 | 0.63 (0.43) |
| rs5906883-rs2283727  | A-C | 0.37 | 0.47 | 0.42 (0.52) |
| rs5906883-rs2283727  | C-A | 0.07 | 0.00 | 1.05 (0.31) |
| rs5906883-rs2283727  | C-C | 0.33 | 0.40 | 0.19 (0.66) |
| rs5906883-rs2283728  | A-C | 0.37 | 0.47 | 0.42 (0.52) |
| rs5906883-rs2283728  | A-T | 0.23 | 0.13 | 0.63 (0.43) |
| rs5906883-rs2283728  | C-C | 0.33 | 0.40 | 0.19 (0.66) |
| rs5906883-rs2283728  | C-T | 0.07 | 0.00 | 1.05 (0.31) |
| rs5906883-rs56220155 | A-A | 0.37 | 0.47 | 0.42 (0.52) |
| rs5906883-rs56220155 | A-G | 0.23 | 0.13 | 0.63 (0.43) |
| rs5906883-rs56220155 | C-A | 0.23 | 0.33 | 0.51 (0.47) |
| rs5906883-rs56220155 | C-G | 0.17 | 0.07 | 0.87 (0.35) |
| rs5906883-rs4824562  | A-A | 0.40 | 0.53 | 0.72 (0.40) |
| rs5906883-rs4824562  | A-G | 0.20 | 0.07 | 1.35 (0.24) |
| rs5906883-rs4824562  | C-A | 0.37 | 0.33 | 0.05 (0.83) |
| rs5906883-rs4824562  | C-G | 0.03 | 0.07 | 0.26 (0.61) |
| rs1465107-rs1465108  | A-A | 0.60 | 0.60 | 0.00 (1.00) |
| rs1465107-rs1465108  | G-G | 0.40 | 0.40 | 0.00 (1.00) |
| rs1465107-rs5905809  | A-C | 0.10 | 0.00 | 1.61 (0.20) |
| rs1465107-rs5905809  | A-G | 0.50 | 0.60 | 0.40 (0.53) |
| rs1465107-rs5905809  | G-C | 0.37 | 0.33 | 0.05 (0.83) |
| rs1465107-rs5905809  | G-G | 0.03 | 0.07 | 0.26 (0.61) |
| rs1465107-rs5906957  | A-A | 0.50 | 0.60 | 0.40 (0.53) |
| rs1465107-rs5906957  | A-G | 0.10 | 0.00 | 1.61 (0.20) |
| rs1465107-rs5906957  | G-A | 0.03 | 0.07 | 0.26 (0.61) |
| rs1465107-rs5906957  | G-G | 0.37 | 0.33 | 0.05 (0.83) |
| rs1465107-rs6323     | A-G | 0.53 | 0.53 | 0.00 (1.00) |
| rs1465107-rs6323     | A-T | 0.07 | 0.07 | 0.00 (1.00) |
| rs1465107-rs6323     | G-G | 0.10 | 0.13 | 0.11 (0.74) |
| rs1465107-rs6323     | G-T | 0.30 | 0.27 | 0.05 (0.82) |
| rs1465107-rs1137070  | A-C | 0.10 | 0.07 | 0.14 (0.71) |
| rs1465107-rs1137070  | A-T | 0.50 | 0.53 | 0.04 (0.83) |
| rs1465107-rs1137070  | G-C | 0.30 | 0.27 | 0.05 (0.82) |

|                      |            |      |      |             |
|----------------------|------------|------|------|-------------|
| rs1465107-rs1137070  | <i>G-T</i> | 0.10 | 0.13 | 0.11 (0.74) |
| rs1465107-rs3027440  | <i>A-C</i> | 0.13 | 0.20 | 0.34 (0.56) |
| rs1465107-rs3027440  | <i>A-T</i> | 0.47 | 0.40 | 0.18 (0.67) |
| rs1465107-rs3027440  | <i>G-C</i> | 0.07 | 0.00 | 1.05 (0.31) |
| rs1465107-rs3027440  | <i>G-T</i> | 0.33 | 0.40 | 0.19 (0.66) |
| rs1465107-rs6324     | <i>A-C</i> | 0.43 | 0.40 | 0.05 (0.83) |
| rs1465107-rs6324     | <i>A-T</i> | 0.17 | 0.20 | 0.08 (0.78) |
| rs1465107-rs6324     | <i>G-C</i> | 0.33 | 0.40 | 0.19 (0.66) |
| rs1465107-rs6324     | <i>G-T</i> | 0.07 | 0.00 | 1.05 (0.31) |
| rs1465107-rs3027441  | <i>A-C</i> | 0.17 | 0.20 | 0.08 (0.78) |
| rs1465107-rs3027441  | <i>A-T</i> | 0.43 | 0.40 | 0.05 (0.83) |
| rs1465107-rs3027441  | <i>G-C</i> | 0.07 | 0.00 | 1.05 (0.31) |
| rs1465107-rs3027441  | <i>G-T</i> | 0.33 | 0.40 | 0.19 (0.66) |
| rs1465107-rs2283727  | <i>A-A</i> | 0.23 | 0.13 | 0.63 (0.43) |
| rs1465107-rs2283727  | <i>A-C</i> | 0.37 | 0.47 | 0.42 (0.52) |
| rs1465107-rs2283727  | <i>G-A</i> | 0.07 | 0.00 | 1.05 (0.31) |
| rs1465107-rs2283727  | <i>G-C</i> | 0.33 | 0.40 | 0.19 (0.66) |
| rs1465107-rs2283728  | <i>A-C</i> | 0.37 | 0.47 | 0.42 (0.52) |
| rs1465107-rs2283728  | <i>A-T</i> | 0.23 | 0.13 | 0.63 (0.43) |
| rs1465107-rs2283728  | <i>G-C</i> | 0.33 | 0.40 | 0.19 (0.66) |
| rs1465107-rs2283728  | <i>G-T</i> | 0.07 | 0.00 | 1.05 (0.31) |
| rs1465107-rs56220155 | <i>A-A</i> | 0.37 | 0.47 | 0.42 (0.52) |
| rs1465107-rs56220155 | <i>A-G</i> | 0.23 | 0.13 | 0.63 (0.43) |
| rs1465107-rs56220155 | <i>G-A</i> | 0.23 | 0.33 | 0.51 (0.47) |
| rs1465107-rs56220155 | <i>G-G</i> | 0.17 | 0.07 | 0.87 (0.35) |
| rs1465107-rs4824562  | <i>A-A</i> | 0.40 | 0.53 | 0.72 (0.40) |
| rs1465107-rs4824562  | <i>A-G</i> | 0.20 | 0.07 | 1.35 (0.24) |
| rs1465107-rs4824562  | <i>G-A</i> | 0.37 | 0.33 | 0.05 (0.83) |
| rs1465107-rs4824562  | <i>G-G</i> | 0.03 | 0.07 | 0.26 (0.61) |
| rs1465108-rs5905809  | <i>A-C</i> | 0.10 | 0.00 | 1.61 (0.20) |
| rs1465108-rs5905809  | <i>A-G</i> | 0.50 | 0.60 | 0.40 (0.53) |
| rs1465108-rs5905809  | <i>G-C</i> | 0.37 | 0.33 | 0.05 (0.83) |
| rs1465108-rs5905809  | <i>G-G</i> | 0.03 | 0.07 | 0.26 (0.61) |
| rs1465108-rs5906957  | <i>A-A</i> | 0.50 | 0.60 | 0.40 (0.53) |
| rs1465108-rs5906957  | <i>A-G</i> | 0.10 | 0.00 | 1.61 (0.20) |
| rs1465108-rs5906957  | <i>G-A</i> | 0.03 | 0.07 | 0.26 (0.61) |
| rs1465108-rs5906957  | <i>G-G</i> | 0.37 | 0.33 | 0.05 (0.83) |
| rs1465108-rs6323     | <i>A-G</i> | 0.53 | 0.53 | 0.00 (1.00) |
| rs1465108-rs6323     | <i>A-T</i> | 0.07 | 0.07 | 0.00 (1.00) |
| rs1465108-rs6323     | <i>G-G</i> | 0.10 | 0.13 | 0.11 (0.74) |
| rs1465108-rs6323     | <i>G-T</i> | 0.30 | 0.27 | 0.05 (0.82) |
| rs1465108-rs1137070  | <i>A-C</i> | 0.10 | 0.07 | 0.14 (0.71) |
| rs1465108-rs1137070  | <i>A-T</i> | 0.50 | 0.53 | 0.04 (0.83) |
| rs1465108-rs1137070  | <i>G-C</i> | 0.30 | 0.27 | 0.05 (0.82) |
| rs1465108-rs1137070  | <i>G-T</i> | 0.10 | 0.13 | 0.11 (0.74) |
| rs1465108-rs3027440  | <i>A-C</i> | 0.13 | 0.20 | 0.34 (0.56) |
| rs1465108-rs3027440  | <i>A-T</i> | 0.47 | 0.40 | 0.18 (0.67) |
| rs1465108-rs3027440  | <i>G-C</i> | 0.07 | 0.00 | 1.05 (0.31) |
| rs1465108-rs3027440  | <i>G-T</i> | 0.33 | 0.40 | 0.19 (0.66) |
| rs1465108-rs6324     | <i>A-C</i> | 0.43 | 0.40 | 0.05 (0.83) |
| rs1465108-rs6324     | <i>A-T</i> | 0.17 | 0.20 | 0.08 (0.78) |
| rs1465108-rs6324     | <i>G-C</i> | 0.33 | 0.40 | 0.19 (0.66) |
| rs1465108-rs6324     | <i>G-T</i> | 0.07 | 0.00 | 1.05 (0.31) |
| rs1465108-rs3027441  | <i>A-C</i> | 0.17 | 0.20 | 0.08 (0.78) |
| rs1465108-rs3027441  | <i>A-T</i> | 0.43 | 0.40 | 0.05 (0.83) |
| rs1465108-rs3027441  | <i>G-C</i> | 0.07 | 0.00 | 1.05 (0.31) |
| rs1465108-rs3027441  | <i>G-T</i> | 0.33 | 0.40 | 0.19 (0.66) |
| rs1465108-rs2283727  | <i>A-A</i> | 0.23 | 0.13 | 0.63 (0.43) |
| rs1465108-rs2283727  | <i>A-C</i> | 0.37 | 0.47 | 0.42 (0.52) |
| rs1465108-rs2283727  | <i>G-A</i> | 0.07 | 0.00 | 1.05 (0.31) |
| rs1465108-rs2283727  | <i>G-C</i> | 0.33 | 0.40 | 0.19 (0.66) |
| rs1465108-rs2283728  | <i>A-C</i> | 0.37 | 0.47 | 0.42 (0.52) |

|                      |     |      |      |             |
|----------------------|-----|------|------|-------------|
| rs1465108-rs2283728  | A-T | 0.23 | 0.13 | 0.63 (0.43) |
| rs1465108-rs2283728  | G-C | 0.33 | 0.40 | 0.19 (0.66) |
| rs1465108-rs2283728  | G-T | 0.07 | 0.00 | 1.05 (0.31) |
| rs1465108-rs56220155 | A-A | 0.37 | 0.47 | 0.42 (0.52) |
| rs1465108-rs56220155 | A-G | 0.23 | 0.13 | 0.63 (0.43) |
| rs1465108-rs56220155 | G-A | 0.23 | 0.33 | 0.51 (0.47) |
| rs1465108-rs56220155 | G-G | 0.17 | 0.07 | 0.87 (0.35) |
| rs1465108-rs4824562  | A-A | 0.40 | 0.53 | 0.72 (0.40) |
| rs1465108-rs4824562  | A-G | 0.20 | 0.07 | 1.35 (0.24) |
| rs1465108-rs4824562  | G-A | 0.37 | 0.33 | 0.05 (0.83) |
| rs1465108-rs4824562  | G-G | 0.03 | 0.07 | 0.26 (0.61) |
| rs5905809-rs5906957  | C-G | 0.47 | 0.33 | 0.73 (0.39) |
| rs5905809-rs5906957  | G-A | 0.53 | 0.67 | 0.73 (0.39) |
| rs5905809-rs6323     | C-G | 0.10 | 0.07 | 0.14 (0.71) |
| rs5905809-rs6323     | C-T | 0.37 | 0.27 | 0.45 (0.50) |
| rs5905809-rs6323     | G-G | 0.53 | 0.60 | 0.18 (0.67) |
| rs5905809-rs6323     | G-T | 0.00 | 0.07 | 2.05 (0.15) |
| rs5905809-rs1137070  | C-C | 0.30 | 0.20 | 0.51 (0.47) |
| rs5905809-rs1137070  | C-T | 0.17 | 0.13 | 0.08 (0.77) |
| rs5905809-rs1137070  | G-C | 0.10 | 0.13 | 0.11 (0.74) |
| rs5905809-rs1137070  | G-T | 0.43 | 0.53 | 0.40 (0.53) |
| rs5905809-rs3027440  | C-C | 0.07 | 0.00 | 1.05 (0.31) |
| rs5905809-rs3027440  | C-T | 0.40 | 0.33 | 0.19 (0.66) |
| rs5905809-rs3027440  | G-C | 0.13 | 0.20 | 0.34 (0.56) |
| rs5905809-rs3027440  | G-T | 0.40 | 0.47 | 0.18 (0.67) |
| rs5905809-rs6324     | C-C | 0.40 | 0.33 | 0.19 (0.66) |
| rs5905809-rs6324     | C-T | 0.07 | 0.00 | 1.05 (0.31) |
| rs5905809-rs6324     | G-C | 0.37 | 0.47 | 0.42 (0.52) |
| rs5905809-rs6324     | G-T | 0.17 | 0.20 | 0.08 (0.78) |
| rs5905809-rs3027441  | C-C | 0.07 | 0.00 | 1.05 (0.31) |
| rs5905809-rs3027441  | C-T | 0.40 | 0.33 | 0.19 (0.66) |
| rs5905809-rs3027441  | G-C | 0.17 | 0.20 | 0.08 (0.78) |
| rs5905809-rs3027441  | G-T | 0.37 | 0.47 | 0.42 (0.52) |
| rs5905809-rs2283727  | C-A | 0.10 | 0.00 | 1.61 (0.20) |
| rs5905809-rs2283727  | C-C | 0.37 | 0.33 | 0.05 (0.83) |
| rs5905809-rs2283727  | G-A | 0.20 | 0.13 | 0.30 (0.58) |
| rs5905809-rs2283727  | G-C | 0.33 | 0.53 | 1.67 (0.20) |
| rs5905809-rs2283728  | C-C | 0.37 | 0.33 | 0.05 (0.83) |
| rs5905809-rs2283728  | C-T | 0.10 | 0.00 | 1.61 (0.20) |
| rs5905809-rs2283728  | G-C | 0.33 | 0.53 | 1.67 (0.20) |
| rs5905809-rs2283728  | G-T | 0.20 | 0.13 | 0.30 (0.58) |
| rs5905809-rs56220155 | C-A | 0.27 | 0.27 | 0.00 (1.00) |
| rs5905809-rs56220155 | C-G | 0.20 | 0.07 | 1.35 (0.24) |
| rs5905809-rs56220155 | G-A | 0.33 | 0.53 | 1.67 (0.20) |
| rs5905809-rs56220155 | G-G | 0.20 | 0.13 | 0.30 (0.58) |
| rs5905809-rs4824562  | C-A | 0.43 | 0.27 | 1.18 (0.28) |
| rs5905809-rs4824562  | C-G | 0.03 | 0.07 | 0.26 (0.61) |
| rs5905809-rs4824562  | G-A | 0.33 | 0.60 | 2.92 (0.09) |
| rs5905809-rs4824562  | G-G | 0.20 | 0.07 | 1.35 (0.24) |
| rs5906957-rs6323     | A-G | 0.53 | 0.60 | 0.18 (0.67) |
| rs5906957-rs6323     | A-T | 0.00 | 0.07 | 2.05 (0.15) |
| rs5906957-rs6323     | G-G | 0.10 | 0.07 | 0.14 (0.71) |
| rs5906957-rs6323     | G-T | 0.37 | 0.27 | 0.45 (0.50) |
| rs5906957-rs1137070  | A-C | 0.10 | 0.13 | 0.11 (0.74) |
| rs5906957-rs1137070  | A-T | 0.43 | 0.53 | 0.40 (0.53) |
| rs5906957-rs1137070  | G-C | 0.30 | 0.20 | 0.51 (0.47) |
| rs5906957-rs1137070  | G-T | 0.17 | 0.13 | 0.08 (0.77) |
| rs5906957-rs3027440  | A-C | 0.13 | 0.20 | 0.34 (0.56) |
| rs5906957-rs3027440  | A-T | 0.40 | 0.47 | 0.18 (0.67) |
| rs5906957-rs3027440  | G-C | 0.07 | 0.00 | 1.05 (0.31) |
| rs5906957-rs3027440  | G-T | 0.40 | 0.33 | 0.19 (0.66) |
| rs5906957-rs6324     | A-C | 0.37 | 0.47 | 0.42 (0.52) |

|                      |     |      |      |             |
|----------------------|-----|------|------|-------------|
| rs5906957-rs6324     | A-T | 0.17 | 0.20 | 0.08 (0.78) |
| rs5906957-rs6324     | G-C | 0.40 | 0.33 | 0.19 (0.66) |
| rs5906957-rs6324     | G-T | 0.07 | 0.00 | 1.05 (0.31) |
| rs5906957-rs3027441  | A-C | 0.17 | 0.20 | 0.08 (0.78) |
| rs5906957-rs3027441  | A-T | 0.37 | 0.47 | 0.42 (0.52) |
| rs5906957-rs3027441  | G-C | 0.07 | 0.00 | 1.05 (0.31) |
| rs5906957-rs3027441  | G-T | 0.40 | 0.33 | 0.19 (0.66) |
| rs5906957-rs2283727  | A-A | 0.20 | 0.13 | 0.30 (0.58) |
| rs5906957-rs2283727  | A-C | 0.33 | 0.53 | 1.67 (0.20) |
| rs5906957-rs2283727  | G-A | 0.10 | 0.00 | 1.61 (0.20) |
| rs5906957-rs2283727  | G-C | 0.37 | 0.33 | 0.05 (0.83) |
| rs5906957-rs2283728  | A-C | 0.33 | 0.53 | 1.67 (0.20) |
| rs5906957-rs2283728  | A-T | 0.20 | 0.13 | 0.30 (0.58) |
| rs5906957-rs2283728  | G-C | 0.37 | 0.33 | 0.05 (0.83) |
| rs5906957-rs2283728  | G-T | 0.10 | 0.00 | 1.61 (0.20) |
| rs5906957-rs56220155 | A-A | 0.33 | 0.53 | 1.67 (0.20) |
| rs5906957-rs56220155 | A-G | 0.20 | 0.13 | 0.30 (0.58) |
| rs5906957-rs56220155 | G-A | 0.27 | 0.27 | 0.00 (1.00) |
| rs5906957-rs56220155 | G-G | 0.20 | 0.07 | 1.35 (0.24) |
| rs5906957-rs4824562  | A-A | 0.33 | 0.60 | 2.92 (0.09) |
| rs5906957-rs4824562  | A-G | 0.20 | 0.07 | 1.35 (0.24) |
| rs5906957-rs4824562  | G-A | 0.43 | 0.27 | 1.18 (0.28) |
| rs5906957-rs4824562  | G-G | 0.03 | 0.07 | 0.26 (0.61) |
| rs6323-rs1137070     | G-C | 0.17 | 0.13 | 0.08 (0.77) |
| rs6323-rs1137070     | G-T | 0.47 | 0.53 | 0.18 (0.67) |
| rs6323-rs1137070     | T-C | 0.23 | 0.20 | 0.06 (0.80) |
| rs6323-rs1137070     | T-T | 0.13 | 0.13 | 0.00 (1.00) |
| rs6323-rs3027440     | G-C | 0.13 | 0.20 | 0.34 (0.56) |
| rs6323-rs3027440     | G-T | 0.50 | 0.47 | 0.04 (0.83) |
| rs6323-rs3027440     | T-C | 0.07 | 0.00 | 1.05 (0.31) |
| rs6323-rs3027440     | T-T | 0.30 | 0.33 | 0.05 (0.82) |
| rs6323-rs6324        | G-C | 0.47 | 0.47 | 0.00 (1.00) |
| rs6323-rs6324        | G-T | 0.17 | 0.20 | 0.08 (0.78) |
| rs6323-rs6324        | T-C | 0.30 | 0.33 | 0.05 (0.82) |
| rs6323-rs6324        | T-T | 0.07 | 0.00 | 1.05 (0.31) |
| rs6323-rs3027441     | G-C | 0.17 | 0.20 | 0.08 (0.78) |
| rs6323-rs3027441     | G-T | 0.47 | 0.47 | 0.00 (1.00) |
| rs6323-rs3027441     | T-C | 0.07 | 0.00 | 1.05 (0.31) |
| rs6323-rs3027441     | T-T | 0.30 | 0.33 | 0.05 (0.82) |
| rs6323-rs2283727     | G-A | 0.27 | 0.13 | 1.03 (0.31) |
| rs6323-rs2283727     | G-C | 0.37 | 0.53 | 1.14 (0.29) |
| rs6323-rs2283727     | T-A | 0.03 | 0.00 | 0.51 (0.47) |
| rs6323-rs2283727     | T-C | 0.33 | 0.33 | 0.00 (1.00) |
| rs6323-rs2283728     | G-C | 0.37 | 0.53 | 1.14 (0.29) |
| rs6323-rs2283728     | G-T | 0.27 | 0.13 | 1.03 (0.31) |
| rs6323-rs2283728     | T-C | 0.33 | 0.33 | 0.00 (1.00) |
| rs6323-rs2283728     | T-T | 0.03 | 0.00 | 0.51 (0.47) |
| rs6323-rs56220155    | G-A | 0.37 | 0.53 | 1.14 (0.29) |
| rs6323-rs56220155    | G-G | 0.27 | 0.13 | 1.03 (0.31) |
| rs6323-rs56220155    | T-A | 0.23 | 0.27 | 0.06 (0.81) |
| rs6323-rs56220155    | T-G | 0.13 | 0.07 | 0.45 (0.50) |
| rs6323-rs4824562     | G-A | 0.43 | 0.53 | 0.40 (0.53) |
| rs6323-rs4824562     | G-G | 0.20 | 0.13 | 0.30 (0.58) |
| rs6323-rs4824562     | T-A | 0.33 | 0.33 | 0.00 (1.00) |
| rs6323-rs4824562     | T-G | 0.03 | 0.00 | 0.51 (0.47) |
| rs1137070-rs3027440  | C-C | 0.03 | 0.00 | 0.51 (0.47) |
| rs1137070-rs3027440  | C-T | 0.37 | 0.33 | 0.05 (0.83) |
| rs1137070-rs3027440  | T-C | 0.17 | 0.20 | 0.08 (0.78) |
| rs1137070-rs3027440  | T-T | 0.43 | 0.47 | 0.05 (0.83) |
| rs1137070-rs6324     | C-C | 0.33 | 0.33 | 0.00 (1.00) |
| rs1137070-rs6324     | C-T | 0.07 | 0.00 | 1.05 (0.31) |
| rs1137070-rs6324     | T-C | 0.43 | 0.47 | 0.05 (0.83) |

|                      |            |      |      |             |
|----------------------|------------|------|------|-------------|
| rs1137070-rs6324     | <i>T-T</i> | 0.17 | 0.20 | 0.08 (0.78) |
| rs1137070-rs3027441  | <i>C-C</i> | 0.07 | 0.00 | 1.05 (0.31) |
| rs1137070-rs3027441  | <i>C-T</i> | 0.33 | 0.33 | 0.00 (1.00) |
| rs1137070-rs3027441  | <i>T-C</i> | 0.17 | 0.20 | 0.08 (0.78) |
| rs1137070-rs3027441  | <i>T-T</i> | 0.43 | 0.47 | 0.05 (0.83) |
| rs1137070-rs2283727  | <i>C-A</i> | 0.07 | 0.00 | 1.05 (0.31) |
| rs1137070-rs2283727  | <i>C-C</i> | 0.33 | 0.33 | 0.00 (1.00) |
| rs1137070-rs2283727  | <i>T-A</i> | 0.23 | 0.13 | 0.63 (0.43) |
| rs1137070-rs2283727  | <i>T-C</i> | 0.37 | 0.53 | 1.14 (0.29) |
| rs1137070-rs2283728  | <i>C-C</i> | 0.33 | 0.33 | 0.00 (1.00) |
| rs1137070-rs2283728  | <i>C-T</i> | 0.07 | 0.00 | 1.05 (0.31) |
| rs1137070-rs2283728  | <i>T-C</i> | 0.37 | 0.53 | 1.14 (0.29) |
| rs1137070-rs2283728  | <i>T-T</i> | 0.23 | 0.13 | 0.63 (0.43) |
| rs1137070-rs56220155 | <i>C-A</i> | 0.23 | 0.27 | 0.06 (0.81) |
| rs1137070-rs56220155 | <i>C-G</i> | 0.17 | 0.07 | 0.87 (0.35) |
| rs1137070-rs56220155 | <i>T-A</i> | 0.37 | 0.53 | 1.14 (0.29) |
| rs1137070-rs56220155 | <i>T-G</i> | 0.23 | 0.13 | 0.63 (0.43) |
| rs1137070-rs4824562  | <i>C-A</i> | 0.37 | 0.33 | 0.05 (0.83) |
| rs1137070-rs4824562  | <i>C-G</i> | 0.03 | 0.00 | 0.51 (0.47) |
| rs1137070-rs4824562  | <i>T-A</i> | 0.40 | 0.53 | 0.72 (0.40) |
| rs1137070-rs4824562  | <i>T-G</i> | 0.20 | 0.13 | 0.30 (0.58) |
| rs3027440-rs6324     | <i>C-T</i> | 0.20 | 0.20 | 0.00 (1.00) |
| rs3027440-rs6324     | <i>T-C</i> | 0.77 | 0.80 | 0.06 (0.80) |
| rs3027440-rs6324     | <i>T-T</i> | 0.03 | 0.00 | 0.51 (0.47) |
| rs3027440-rs3027441  | <i>C-C</i> | 0.20 | 0.20 | 0.00 (1.00) |
| rs3027440-rs3027441  | <i>T-C</i> | 0.03 | 0.00 | 0.51 (0.47) |
| rs3027440-rs3027441  | <i>T-T</i> | 0.77 | 0.80 | 0.06 (0.80) |
| rs3027440-rs2283727  | <i>C-A</i> | 0.17 | 0.13 | 0.08 (0.77) |
| rs3027440-rs2283727  | <i>C-C</i> | 0.03 | 0.07 | 0.26 (0.61) |
| rs3027440-rs2283727  | <i>T-A</i> | 0.13 | 0.00 | 2.20 (0.14) |
| rs3027440-rs2283727  | <i>T-C</i> | 0.67 | 0.80 | 0.87 (0.35) |
| rs3027440-rs2283728  | <i>C-C</i> | 0.03 | 0.07 | 0.26 (0.61) |
| rs3027440-rs2283728  | <i>C-T</i> | 0.17 | 0.13 | 0.08 (0.77) |
| rs3027440-rs2283728  | <i>T-C</i> | 0.67 | 0.80 | 0.87 (0.35) |
| rs3027440-rs2283728  | <i>T-T</i> | 0.13 | 0.00 | 2.20 (0.14) |
| rs3027440-rs56220155 | <i>C-A</i> | 0.03 | 0.07 | 0.26 (0.61) |
| rs3027440-rs56220155 | <i>C-G</i> | 0.17 | 0.13 | 0.08 (0.77) |
| rs3027440-rs56220155 | <i>T-A</i> | 0.57 | 0.73 | 1.18 (0.28) |
| rs3027440-rs56220155 | <i>T-G</i> | 0.23 | 0.07 | 1.90 (0.17) |
| rs3027440-rs4824562  | <i>C-A</i> | 0.20 | 0.20 | 0.00 (1.00) |
| rs3027440-rs4824562  | <i>T-A</i> | 0.57 | 0.67 | 0.42 (0.52) |
| rs3027440-rs4824562  | <i>T-G</i> | 0.23 | 0.13 | 0.63 (0.43) |
| rs6324-rs3027441     | <i>C-T</i> | 0.77 | 0.80 | 0.06 (0.80) |
| rs6324-rs3027441     | <i>T-C</i> | 0.23 | 0.20 | 0.06 (0.80) |
| rs6324-rs2283727     | <i>C-A</i> | 0.10 | 0.00 | 1.61 (0.20) |
| rs6324-rs2283727     | <i>C-C</i> | 0.67 | 0.80 | 0.87 (0.35) |
| rs6324-rs2283727     | <i>T-A</i> | 0.20 | 0.13 | 0.30 (0.58) |
| rs6324-rs2283727     | <i>T-C</i> | 0.03 | 0.07 | 0.26 (0.61) |
| rs6324-rs2283728     | <i>C-C</i> | 0.67 | 0.80 | 0.87 (0.35) |
| rs6324-rs2283728     | <i>C-T</i> | 0.10 | 0.00 | 1.61 (0.20) |
| rs6324-rs2283728     | <i>T-C</i> | 0.03 | 0.07 | 0.26 (0.61) |
| rs6324-rs2283728     | <i>T-T</i> | 0.20 | 0.13 | 0.30 (0.58) |
| rs6324-rs56220155    | <i>C-A</i> | 0.57 | 0.73 | 1.18 (0.28) |
| rs6324-rs56220155    | <i>C-G</i> | 0.20 | 0.07 | 1.35 (0.24) |
| rs6324-rs56220155    | <i>T-A</i> | 0.03 | 0.07 | 0.26 (0.61) |
| rs6324-rs56220155    | <i>T-G</i> | 0.20 | 0.13 | 0.30 (0.58) |
| rs6324-rs4824562     | <i>C-A</i> | 0.53 | 0.67 | 0.73 (0.39) |
| rs6324-rs4824562     | <i>C-G</i> | 0.23 | 0.13 | 0.63 (0.43) |
| rs6324-rs4824562     | <i>T-A</i> | 0.23 | 0.20 | 0.06 (0.80) |
| rs3027441-rs2283727  | <i>C-A</i> | 0.20 | 0.13 | 0.30 (0.58) |
| rs3027441-rs2283727  | <i>C-C</i> | 0.03 | 0.07 | 0.26 (0.61) |
| rs3027441-rs2283727  | <i>T-A</i> | 0.10 | 0.00 | 1.61 (0.20) |

|                      |            |      |      |             |
|----------------------|------------|------|------|-------------|
| rs3027441-rs2283727  | <i>T-C</i> | 0.67 | 0.80 | 0.87 (0.35) |
| rs3027441-rs2283728  | <i>C-C</i> | 0.03 | 0.07 | 0.26 (0.61) |
| rs3027441-rs2283728  | <i>C-T</i> | 0.20 | 0.13 | 0.30 (0.58) |
| rs3027441-rs2283728  | <i>T-C</i> | 0.67 | 0.80 | 0.87 (0.35) |
| rs3027441-rs2283728  | <i>T-T</i> | 0.10 | 0.00 | 1.61 (0.20) |
| rs3027441-rs56220155 | <i>C-A</i> | 0.03 | 0.07 | 0.26 (0.61) |
| rs3027441-rs56220155 | <i>C-G</i> | 0.20 | 0.13 | 0.30 (0.58) |
| rs3027441-rs56220155 | <i>T-A</i> | 0.57 | 0.73 | 1.18 (0.28) |
| rs3027441-rs56220155 | <i>T-G</i> | 0.20 | 0.07 | 1.35 (0.24) |
| rs3027441-rs4824562  | <i>C-A</i> | 0.23 | 0.20 | 0.06 (0.80) |
| rs3027441-rs4824562  | <i>T-A</i> | 0.53 | 0.67 | 0.73 (0.39) |
| rs3027441-rs4824562  | <i>T-G</i> | 0.23 | 0.13 | 0.63 (0.43) |
| rs2283727-rs2283728  | <i>A-T</i> | 0.30 | 0.13 | 1.50 (0.22) |
| rs2283727-rs2283728  | <i>C-C</i> | 0.70 | 0.87 | 1.50 (0.22) |
| rs2283727-rs56220155 | <i>A-G</i> | 0.30 | 0.13 | 1.50 (0.22) |
| rs2283727-rs56220155 | <i>C-A</i> | 0.60 | 0.80 | 1.80 (0.18) |
| rs2283727-rs56220155 | <i>C-G</i> | 0.10 | 0.07 | 0.14 (0.71) |
| rs2283727-rs4824562  | <i>A-A</i> | 0.27 | 0.13 | 1.03 (0.31) |
| rs2283727-rs4824562  | <i>A-G</i> | 0.03 | 0.00 | 0.51 (0.47) |
| rs2283727-rs4824562  | <i>C-A</i> | 0.50 | 0.73 | 2.23 (0.14) |
| rs2283727-rs4824562  | <i>C-G</i> | 0.20 | 0.13 | 0.30 (0.58) |
| rs2283728-rs56220155 | <i>C-A</i> | 0.60 | 0.80 | 1.80 (0.18) |
| rs2283728-rs56220155 | <i>C-G</i> | 0.10 | 0.07 | 0.14 (0.71) |
| rs2283728-rs56220155 | <i>T-G</i> | 0.30 | 0.13 | 1.50 (0.22) |
| rs2283728-rs4824562  | <i>C-A</i> | 0.50 | 0.73 | 2.23 (0.14) |
| rs2283728-rs4824562  | <i>C-G</i> | 0.20 | 0.13 | 0.30 (0.58) |
| rs2283728-rs4824562  | <i>T-A</i> | 0.27 | 0.13 | 1.03 (0.31) |
| rs2283728-rs4824562  | <i>T-G</i> | 0.03 | 0.00 | 0.51 (0.47) |
| rs56220155-rs4824562 | <i>A-A</i> | 0.40 | 0.67 | 2.85 (0.09) |
| rs56220155-rs4824562 | <i>A-G</i> | 0.20 | 0.13 | 0.30 (0.58) |
| rs56220155-rs4824562 | <i>G-A</i> | 0.37 | 0.20 | 1.30 (0.25) |
| rs56220155-rs4824562 | <i>G-G</i> | 0.03 | 0.00 | 0.51 (0.47) |

---
