# Supplementary material for: Pilot study indicate role of preferentially transmitted monoamine oxidase gene variants in behavioral problems of male ADHD probands
Source: PubMed Central journal article supplement (PMC5629801; doi:10.1186/s12881-017-0469-5), 2017-10-05
Supplement: 12881_2017_469_MOESM7_ESM.pdf [file 12881_2017_469_MOESM7_ESM.pdf]

**Additional file 7: Analysis of allelic association with CPRS-R ‘T scores’ for oppositional behavior and PACS scores for conduct problems in male ADHD probands**

| Genes       | Variants   | Alleles      | CPRS-R ‘T scores’ for oppositional behavior |              | PACS scores for conduct problems |         |
|-------------|------------|--------------|---------------------------------------------|--------------|----------------------------------|---------|
|             |            |              | Mean ± SE                                   | p-value      | Mean ± SE                        | p-value |
| <i>MAOA</i> | 30bp-uVNTR | 3R           | 63.15 ± 1.65                                | 0.28         | 16.35 ± 1.53                     | 0.33    |
|             |            | 4R           | 61.57 ± 2.00                                |              | 17.50 ± 2.17                     |         |
|             | rs5906883  | A            | 61.93 ± 1.62                                | 0.23         | 16.40 ± 1.58                     | 0.35    |
|             |            | C            | 63.91 ± 2.11                                |              | 17.39 ± 2.03                     |         |
|             | rs1465107  | G            | 65.16 ± 2.14                                | 0.08         | 17.82 ± 2.08                     | 0.27    |
|             |            | A            | 61.39 ± 1.59                                |              | 16.18 ± 1.56                     |         |
|             | rs1465108  | A            | 61.39 ± 1.59                                | 0.08         | 16.18 ± 1.56                     | 0.27    |
|             |            | G            | 65.16 ± 2.14                                |              | 17.82 ± 2.08                     |         |
|             | rs5905809  | C            | 62.80 ± 2.12                                | 0.46         | 17.89 ± 2.06                     | 0.26    |
|             |            | G            | 62.52 ± 1.62                                |              | 16.15 ± 1.57                     |         |
|             | rs5906957  | A            | 62.52 ± 1.62                                | 0.46         | 16.15 ± 1.57                     | 0.26    |
|             |            | G            | 62.80 ± 2.12                                |              | 17.89 ± 2.06                     |         |
|             | rs6323     | T            | 59.48 ± 2.51                                | 0.08         | 18.30 ± 2.14                     | 0.22    |
|             |            | G            | 63.67 ± 1.49                                |              | 16.13 ± 1.52                     |         |
| rs1137070   | C          | 64.30 ± 2.15 | 0.17                                        | 19.11 ± 1.95 | 0.09                             |         |
|             | T          | 61.72 ± 1.60 |                                             | 15.53 ± 1.58 |                                  |         |
| <i>MAOB</i> | rs4824562  | A            | 61.88 ± 1.43                                | 0.13         | 17.42 ± 1.41                     | 0.13    |
|             |            | G            | 65.52 ± 2.91                                |              | 13.88 ± 2.62                     |         |
|             | rs56220155 | G            | 63.06 ± 2.34                                | 0.42         | 15.32 ± 2.31                     | 0.25    |
|             |            | A            | 62.46 ± 1.54                                |              | 17.25 ± 1.48                     |         |
|             | rs2283728  | T            | 63.46 ± 2.57                                | 0.37         | 14.67 ± 2.55                     | 0.22    |
|             |            | C            | 62.39 ± 1.48                                |              | 17.19 ± 1.41                     |         |
|             | rs2283727  | C            | 62.39 ± 1.48                                | 0.37         | 17.19 ± 1.41                     | 0.22    |
|             |            | A            | 63.46 ± 2.57                                |              | 14.67 ± 2.55                     |         |
|             | rs3027441  | C            | 64.55 ± 2.60                                | 0.21         | 16.00 ± 2.76                     | 0.40    |
|             |            | T            | 62.08 ± 1.48                                |              | 16.87 ± 1.39                     |         |
|             | rs6324     | C            | 62.08 ± 1.48                                | 0.21         | 16.87 ± 1.39                     | 0.40    |
|             |            | T            | 64.55 ± 2.60                                |              | 16.00 ± 2.76                     |         |
| rs3027440   | T          | 62.37 ± 1.42 | 0.33                                        | 17.08 ± 1.39 | 0.25                             |         |
|             | C          | 63.86 ± 3.07 |                                             | 14.67 ± 2.68 |                                  |         |
