# Supplementary material for: Pilot study indicate role of preferentially transmitted monoamine oxidase gene variants in behavioral problems of male ADHD probands
Source: PubMed Central journal article supplement (PMC5629801; doi:10.1186/s12881-017-0469-5), 2017-10-05
Supplement: 12881_2017_469_MOESM8_ESM.pdf [file 12881_2017_469_MOESM8_ESM.pdf]

**Additional file 8: Analysis of allelic association with the status of age-of-onset of ADHD in the male probands**

| <b>Genes</b> | <b>Variants</b> | <b>Alleles</b> | <b>Early onset</b> | <b>Late onset</b> | <b><math>\chi^2</math> (<i>p</i>-value)</b> |
|--------------|-----------------|----------------|--------------------|-------------------|---------------------------------------------|
| <i>MAOA</i>  | 30bp-uVNTR      | 3R             | 0.71               | 0.63              | 1.35 (0.25)                                 |
|              |                 | 4R             | 0.29               | 0.37              |                                             |
|              | rs5906883       | A              | 0.69               | 0.64              | 0.3 (0.58)                                  |
|              |                 | C              | 0.31               | 0.36              |                                             |
|              | rs1465107       | G              | 0.30               | 0.34              | 0.2 (0.65)                                  |
|              |                 | A              | 0.70               | 0.66              |                                             |
|              | rs1465108       | A              | 0.70               | 0.66              | 0.2 (0.65)                                  |
|              |                 | G              | 0.30               | 0.34              |                                             |
|              | rs5905809       | C              | 0.32               | 0.36              | 0.18 (0.67)                                 |
|              |                 | G              | 0.68               | 0.64              |                                             |
| rs5906957    | A               | 0.68           | 0.64               | 0.18 (0.67)       |                                             |
|              | G               | 0.32           | 0.36               |                   |                                             |
| rs6323       | T               | 0.24           | 0.29               | 0.44 (0.51)       |                                             |
|              | G               | 0.76           | 0.71               |                   |                                             |
| rs1137070    | C               | 0.32           | 0.34               | 0.04 (0.84)       |                                             |
|              | T               | 0.68           | 0.66               |                   |                                             |
| <i>MAOB</i>  | rs4824562       | A              | 0.82               | 0.80              | 0.06 (0.81)                                 |
|              |                 | G              | 0.18               | 0.20              |                                             |
|              | rs56220155      | G              | 0.26               | 0.25              | 0.01 (0.92)                                 |
|              |                 | A              | 0.74               | 0.75              |                                             |
|              | rs2283728       | T              | 0.18               | 0.21              | 0.26 (0.61)                                 |
|              |                 | C              | 0.82               | 0.79              |                                             |
|              | rs2283727       | C              | 0.82               | 0.79              | 0.26 (0.61)                                 |
|              |                 | A              | 0.18               | 0.21              |                                             |
|              | rs3027441       | C              | 0.19               | 0.21              | 0.13 (0.72)                                 |
|              |                 | T              | 0.81               | 0.79              |                                             |
| rs6324       | C               | 0.81           | 0.79               | 0.13 (0.72)       |                                             |
|              | T               | 0.19           | 0.21               |                   |                                             |
| rs3027440    | T               | 0.85           | 0.86               | 0.03 (0.87)       |                                             |
|              | C               | 0.15           | 0.14               |                   |                                             |
